# Supplementary material for: Longitudinal data collection in pediatric and adult patients with 5q spinal muscular atrophy in Latin America: LATAM RegistrAME study - a clinical registry study protocol
Source: PubMed Central journal article supplement (PMC11634359; doi:10.31744/einstein_journal/2024ae1133), 2024-11-12
Supplement: 2317-6385-eins-22-eAE1133-suppl01.pdf [file 2317-6385-eins-22-eAE1133-suppl01.pdf]

## I SUPPLEMENTARY MATERIAL

# Current landscape of clinical use of *ex vivo* expanded Natural Killer cells for cancer therapy

Júlia Teixeira Cottas de Azevedo, Juliana Aparecida Preto de Godoy, Cláudia de Souza, Micheli Severo Sielski, Larissa Leggieri Coa, Augusto Barbosa Júnior, Lucila Nassif Kerbauy, Andrea Tiemi Kondo, Oswaldo Keith Okamoto, Nelson Hamerschlak, José Mauro Kutner, Raquel de Melo Alves Paiva

DOI: 10.31744/einstein\_journal/2024RW0612

**Table 1S.** Currently ongoing clinical trials using natural killer cells expanded via feeder cells

| Identification of clinical trials | Title                                                                                                                     | Phase | Localization                                  | Status    | Condition                                   | Dose (cells/kg)                                     | Age (y)  | Conditioning regime              | Type of feeder cell | Reference                                                 |
|-----------------------------------|---------------------------------------------------------------------------------------------------------------------------|-------|-----------------------------------------------|-----------|---------------------------------------------|-----------------------------------------------------|----------|----------------------------------|---------------------|-----------------------------------------------------------|
| NCT02481934                       | Clinical Trial using Expanded and Activated Autologous NK Cells to Treat Multiple Myelomas (NK-VS-MM)                     | I     | Hospital Universitario 12 de Octubre          | Completed | Multiple myeloma                            | 8 doses : $7.5 \times 10^6$ (2 infusions per cycle) | 61-72    | Lenalidomide or Bortezomib       | K562-mbIL15-41BBL   | Leivas et al. <sup>(21)</sup>                             |
| NCT02030561                       | NK Cell Infusions With Trastuzumab to treat Patients With HER2+ Breast and Gastric Cancers                                | I/II  | National University Hospital, Singapore       | Unknown   | Breast cancer                               | 1 dose: $1 \times 10^7$                             | 32-67    | Trastuzumab                      | K562-mbIL15-41BBL   | Lee et al. <sup>(6)</sup><br>Yadav et al. <sup>(23)</sup> |
| NCT02507154                       | Reactivating NK Cells in Treating Refractory Head and Neck Cancers (NKEXPHNC)                                             | I/II  | National University Hospital, Singapore       | Unknown   | Carcinoma (nasopharyngeal)                  | 2 doses: $1 \times 10^6$ or $1 \times 10^7$         | 45-66    | Cetuximab                        | K562-mbIL15-41BBL   | Lim et al. <sup>(22)</sup>                                |
| NCT02123836                       | Natural Killer Cells in Acute Leukemia and Myelodysplastic Syndrome                                                       | I     | National University Hospital, Singapore       | Unknown   | Acute leukemia and myelodysplastic syndrome | 1 dose: $1 \times 10^8$ (0.5- $20 \times 10^7$ )    | 6-80     | Fludarabine and cyclophosphamide | K562-mbIL15-41BBL   | Fujisaki et al. <sup>(18)</sup>                           |
| NCT01974479**                     | Pilot Study of Redirected Haploidentical Natural Killer Cell Infusions for B-Lineage Acute Lymphoblastic Leukemia         | I     | National University Hospital, Singapore       | Suspended | B-cell acute lymphoblastic leukemia         | 1 dose: $0.5 \times 10^7$ - $1 \times 10^8$         | up to 80 | Fludarabine and cyclophosphamide | K562-mbIL15-41BBL   | NA                                                        |
| NCT00995137**                     | Genetically Modified Haploidentical Natural Killer Cell Infusions for B-Lineage Acute Lymphoblastic Leukemia              | I     | St. Jude Children's Research Hospital         | Completed | B-cell acute lymphoblastic leukemia         | NA                                                  | up to 18 | NA                               | K562-mbIL15-41BBL   | NA                                                        |
| NCT02763475                       | NK Cells as Consolidation Therapy of Acute Myeloid Leukemia in Children/Adolescents                                       | II    | Hospital Infantil Universitario Niño Jesús    | Completed | Acute myeloid leukemia                      | 2 doses: $6.92 \times 10^6$ - $1.93 \times 10^8$    | 0.7-16   | Fludarabine and cyclophosphamide | K562-mbIL15-41BBL   | Gómez García et al. <sup>(20)</sup>                       |
| NCT03209869                       | Treatment of Relapsed or Refractory Neuroblastoma and Osteosarcoma With Expanded Haploidentical NK Cells and Hu14.18-IL-2 | I     | University of Wisconsin Carbone Cancer Center | Suspended | Neuroblastoma and Osteosarcoma              | NA                                                  | 0.7-25   | NA                               | K562-mbIL15-41BBL   | NA                                                        |

continue...

...Continuation

**Table 1S.** Currently ongoing clinical trials using natural killer cells expanded via feeder cells

| Identification of clinical trials | Title                                                                                                                                                                                                                   | Phase | Localization                                      | Status     | Condition                                                                                        | Dose (cells/kg)                                                                                        | Age (y)    | Conditioning regime                                                                                                                | Type of feeder cell | Reference                     |
|-----------------------------------|-------------------------------------------------------------------------------------------------------------------------------------------------------------------------------------------------------------------------|-------|---------------------------------------------------|------------|--------------------------------------------------------------------------------------------------|--------------------------------------------------------------------------------------------------------|------------|------------------------------------------------------------------------------------------------------------------------------------|---------------------|-------------------------------|
| NCT01944982                       | Salvage Therapy With Chemotherapy and Natural Killer Cells in Relapsed/ Refractory Pediatric T Cell Lymphoblastic Leukemia and Lymphoma (HNJ-NKAES-2012)                                                                | I/II  | Hospital Infantil Universitario Niño Jesús        | Terminated | Acute T-cell lymphoblastic leukemia                                                              | 2 doses: first dose up to $5 \times 10^7$ and second dose up to $1 \times 10^8$                        | 3-19       | Nelarabine, etoposide and cyclophosphamide                                                                                         | K562-mbIL15-4-1BBL  | Vela et al. <sup>(19)</sup>   |
| NCT02074657                       | "LANK-2": Activated and Expanded NK Cell Immunotherapy Together With Salvage Chemotherapy in Children, Adolescents and Young Adults With Relapsed or Refractory Acute Leukemia (LYDIA)                                  | I/II  | Hospital Infantil Universitario Niño Jesús        | Terminated | Acute myeloid leukemia, T-cell acute lymphoblastic leukemia, B-cell acute lymphoblastic leukemia | 4 doses: first and second doses up to $2.5 \times 10^7$ ; third and fourth doses up to $5 \times 10^7$ | 1-23       | Clofarabine, etoposide and cyclophosphamide; or Fludarabine, idarubicin, cytarabine and G-CSF; or Fludarabine and cyclophosphamide | K562-mbIL15-4-1BBL  | Vela et al. <sup>(19)</sup>   |
| NCT01287104*                      | A Phase I Study on NK Cell Infusion Following Allogeneic Peripheral Blood Stem Cell Transplantation From Related or Matched Unrelated Donors in Pediatric Patients With Solid Tumors and Leukemias                      | I     | National Institutes of Health Clinical Center     | Completed  | Sarcoma                                                                                          | 2 doses: $1 \times 10^5$ or $\times 10^6$                                                              | 4-35       | Etoposide, vincristine, adriamycin, prednisone, cyclophosphamide, fludarabine and melphalan                                        | K562-mbIL15-4-1BBL  | Shah et al. <sup>(46)</sup>   |
| NCT02809092                       | Interleukin-21 (IL-21)-Expanded Natural Killer Cells for Induction of Acute Myeloid Leukemia                                                                                                                            | I/II  | Hospital de Clínicas de Porto Alegre              | Unknown    | Acute myeloid leukemia                                                                           | 6 doses: $10^6$ - $10^7$                                                                               | 2-59       | Fludarabine, Cytarabine and G-CSF                                                                                                  | K562-mbIL21         | Denman et al. <sup>(26)</sup> |
| NCT04836390*                      | Donor-Derived <i>Ex-Vivo</i> Expanded Natural Killer Cell Infusions in Children and Young Adults With High Risk Acute Myeloid Leukemia Receiving Myeloablative HLA-Haploidentical Hematopoietic Cell Transplant (EXCEL) | II    | Children's Hospital Los Angeles                   | Recruiting | Acute myeloid leukemia                                                                           | 3 doses: $1 \times 10^8$                                                                               | up to 25   | Busulfan and Cyclophosphamide                                                                                                      | K562-mbIL21         | NA                            |
| NCT04220684                       | Ph1 Trial Test Safety of IL-21 NK Cells for Induction of R/R AML                                                                                                                                                        | I     | Ohio State University Comprehensive Cancer Center | Recruiting | Acute myeloid leukemia and myelodysplastic syndrome                                              | 6 doses: $1 \times 10^7$ or $3 \times 10^7$ or $1 \times 10^8$                                         | 18 or more | Fludarabine and Cytarabine or Fludarabine and Decitabine                                                                           | K562-mbIL21         | Vasu et al. <sup>(47)</sup>   |
| NCT01787474                       | Donor Natural Killer Cells in Treating Patients With Relapsed or Refractory Acute Myeloid Leukemia                                                                                                                      | I/II  | MD Anderson Cancer Center                         | Completed  | Acute myeloid leukemia and myelodysplastic syndrome                                              | 6 doses: $1 \times 10^6$ or $5 \times 10^6$                                                            | 12-70      | Fludarabine, Cytarabine and G-CSF                                                                                                  | K562-mbIL21         | Ciurea et al. <sup>(26)</sup> |

continue...

...Continuation

**Table 1S.** Currently ongoing clinical trials using natural killer cells expanded via feeder cells

| Identification of clinical trials | Title                                                                                                                                                                           | Phase | Localization                                  | Status                 | Condition                                                                  | Dose (cells/kg)                                                                                                                        | Age (y)    | Conditioning regime                                                                       | Type of feeder cell         | Reference                                                          |
|-----------------------------------|---------------------------------------------------------------------------------------------------------------------------------------------------------------------------------|-------|-----------------------------------------------|------------------------|----------------------------------------------------------------------------|----------------------------------------------------------------------------------------------------------------------------------------|------------|-------------------------------------------------------------------------------------------|-----------------------------|--------------------------------------------------------------------|
| NCT03348033                       | Safety and Feasibility of the Use of Natural Killer Cells in Patients With Chronic Myeloid Leukemia                                                                             | I/II  | Hospital de Clínicas de Porto Alegre          | Recruiting             | Chronic myeloid leukemia                                                   | 6 doses                                                                                                                                | 2-59       | Fludarabine, Cytarabine and G-CSF                                                         | K562-mbIL21                 | NA                                                                 |
| NCT01729091*                      | Umbilical Cord Blood-Derived Natural Killer Cells, Elotuzumab, Lenalidomide, and High Dose Melphalan, Followed by Stem Cell Transplant to Treat Patients With Multiple Myelomas | II    | MD Anderson Cancer Center                     | Active, not recruiting | Multiple myeloma                                                           | 1 dose: up to $1 \times 10^8$                                                                                                          | 18-75      | Lenalidomide and melphalan                                                                | K562-mbIL21                 | Shah et al. <sup>(30)</sup>                                        |
| NCT01904136*                      | Natural Killer Cells Before and After Donor Stem Cell Transplant to Treat Patients With Acute Myeloid Leukemia, Myelodysplastic Syndrome, or Chronic Myelogenous Leukemia       | I/II  | MD Anderson Cancer Center                     | Completed              | Acute myeloid leukemia, Chronic myeloid leukemia, Myelodysplastic syndrome | 3 doses: $1 \times 10^5$ - $1 \times 10^8$                                                                                             | 18-60      | Melphalan, fludarabine and total body irradiation                                         | K562-mbIL21-4-1BBL          | Ciurea et al. <sup>(26,27)</sup>                                   |
| NCT03056339**                     | Umbilical & Cord Blood (CB) Derived CAR-Engineered NK Cells for B Lymphoid Malignancies                                                                                         | I/II  | MD Anderson Cancer Center                     | Active, not recruiting | B cell lymphomas                                                           | 1 dose: $1 \times 10^5$ or $1 \times 10^6$ or $1 \times 10^7$                                                                          | 7-80       | Fludarabine and cyclophosphamide                                                          | K562-mbIL21-4-1BBL          | Liu et al. <sup>(48)</sup>                                         |
| NCT04254419                       | Intra-tumoral Injection of Natural Killer Cells in High-Grade Gliomas (NK HGG)                                                                                                  | I     | Nationwide Children's Hospital Columbus       | Not recruiting         | Glioma                                                                     | NA                                                                                                                                     | 3-17       | NA                                                                                        | NA                          | NA                                                                 |
| NCT02890758                       | Phase I Trial of Universal Donor NK Cell Therapy in Combination With ALT803                                                                                                     | I     | University Hospitals Cleveland Medical Center | Active, not recruiting | Colorectal carcinoma, Myelodysplastic syndrome, Acute myeloid leukemia     | 2 doses: $1 \times 10^7$ or $2.5 \times 10^7$ or $5 \times 10^7$                                                                       | 18 or more | Fludarabine and cyclophosphamide                                                          | NKF cells (OCI/AML3-mbIL21) | Ojo et al. <sup>(35)</sup><br>Otegbeye et al. <sup>(36)</sup>      |
| NCT01212341                       | Allogeneic Natural Killer (NK) Cell Therapy in Patients With Lymphomas or Solid Tumors (MG4101)                                                                                 | I     | Seoul National University Hospital            | Complete               | Lymphoma or solid tumor                                                    | 1 dose: $1 \times 10^6$ or $1 \times 10^7$ or Repeated doses: $1 \times 10^6$ or $3 \times 10^6$ or $1 \times 10^7$ or $3 \times 10^7$ | 18 or more | NA                                                                                        | PBMC                        | Yang et al. <sup>(38)</sup>                                        |
| UMIN000007527                     | -                                                                                                                                                                               | I     | Kyoto Prefectural University of Medicine      | -                      | Digestive cancer                                                           | 3 doses: $0.5 \times 10^9$ , $1.0 \times 10^9$ , $2.0 \times 10^9$ cells/injection                                                     | 48-78      | S-1 or none                                                                               | FN-CH296 induced T cells.   | Sakamoto et al. <sup>(39)</sup>                                    |
| UMIN000013378                     | -                                                                                                                                                                               | I     | Kyoto Prefectural University of Medicine      | -                      | Digestive cancer                                                           | 3 doses: $0.5 \times 10^9$ , $1.0 \times 10^9$ , $2.0 \times 10^9$ cells/injection                                                     | 34-79      | capecitabine or S1, cisplatin, Trastuzumab; or capecitabine or S1, oxaliplatin, Cetuximab | FN-CH296 induced T cells.   | Sakamoto et al. <sup>(39)</sup><br>Ishikawa et al. <sup>(40)</sup> |

\* Natural killer cell therapy associated with hematopoietic stem cell transplantation; \*\* Chimeric Antigen Receptor (CAR)-modified NK cells.
